# Supplementary material for: From publication to action: Connecting science, policy, and public attention for ocean-related climate mitigation
Source: Research Square preprint supplement (doi:10.21203/rs.3.rs-8114358/v1), 2025-12-03
Supplement: Supplementary file 1 [file 51c188ff26abd8f5a717ccd0.pdf]

## Supplementary Information

### From publication to action: Connecting science, policy, and public attention for ocean-related climate mitigation

Devi Veytia<sup>1,\*</sup>, Laurent Bopp<sup>1</sup>, Vicky Martí Barclay<sup>2</sup>, Simon Neill<sup>3</sup>, Marie Bonnin<sup>4</sup>, Daniela M. Carranza<sup>4,5</sup>, Joachim Claudet<sup>6</sup>, Adrien Comte<sup>4</sup>, Gaël Mariani<sup>5</sup>, Yunne-Jai Shin<sup>5</sup>, Olivier Thébaud<sup>7</sup>, Christian R. Voolstra<sup>8</sup>, Frédérique Viard<sup>9</sup>, and Jean-Pierre Gattuso<sup>10,11</sup>

<sup>1</sup>Laboratoire de Météorologie Dynamique, Institut Pierre-Simon Laplace, CNRS, École normale supérieure / PSL, - Sorbonne Université, École Polytechnique, Paris, France

<sup>2</sup>Civil and Environmental Engineering, University of Strathclyde, Glasgow, UK

<sup>3</sup>School of Ocean Sciences, Bangor University, Menai Bridge, UK

<sup>4</sup>IRD, CNRS, Ifremer, LEMAR, Brest University, Plouzané, France

<sup>5</sup>MARBEC, Univ Montpellier, IRD, CNRS, Ifremer, Montpellier, France

<sup>6</sup>CNRS, PSL-EPHE-UPVD, CRILOBE, Maison de l'Océan, Paris, France

<sup>7</sup>Ifremer, Univ Brest, CNRS, IRD, UMR 6308, AMURE, Unité d'Economie Maritime, IUEM, Plouzané, France, F-29280

<sup>8</sup>Department of Biology, University of Konstanz, Konstanz, Germany

<sup>9</sup>ISEM, Univ Montpellier, CNRS, IRD, Montpellier, France

<sup>10</sup>Laboratoire d'Océanographie de Villefranche, CNRS, Sorbonne University, Villefranche-sur-Mer, France

<sup>11</sup>Institut du Développement Durable et des Relations Internationales (IDDRI), Paris, France

\*Correspondence: dev.veytia@lmd.ipsl.fr

## 1 LLM classifier of ORO type

Supplementary Table 1: Eligibility criteria for article inclusion. Articles are screened for inclusion/exclusion based on the title, abstract and keywords. If any criterion fails the article is excluded – all criteria must be met in order to be included. If insufficient information is provided to cause sufficient doubt that a criterion is met, assume the criterion is failed.

|                  | INCLUDE                                                                                                                                                                                                                                                                                                     | EXCLUDE                                                                                                                                                                                                    |
|------------------|-------------------------------------------------------------------------------------------------------------------------------------------------------------------------------------------------------------------------------------------------------------------------------------------------------------|------------------------------------------------------------------------------------------------------------------------------------------------------------------------------------------------------------|
| Article language | Article is written in English                                                                                                                                                                                                                                                                               | Article is not written in English                                                                                                                                                                          |
| Population       | The intervention located in a marine system (open-ocean, coastal ocean, coastal land). This includes: coastal and intertidal/brackish habitats (e.g. estuaries, saline coastal wetlands, tidal marshes, mangroves); pelagic & benthic zones across all biomes; seas, gulfs, and oceans; artificial habitats | The intervention is located on coastal land and not associated with coastal blue carbon habitats or ocean-related resources; e.g. terrestrial and freshwater ecosystems (e.g. rivers, freshwater wetlands) |

Supplementary Table 1: (continued)

|              |                                                                                                                                                                                                                                                                                                                                                                                                                                                                                                                                                                                                                                                                                                                                                                                                                                                                                                                                                                                                                                                          |                                                                                                                                                                                                                                                                                                                                                                                                                                                                                                                                                                                                                                                                                                                                                                                                                                                                                                                                                                                                                                                                                     |
|--------------|----------------------------------------------------------------------------------------------------------------------------------------------------------------------------------------------------------------------------------------------------------------------------------------------------------------------------------------------------------------------------------------------------------------------------------------------------------------------------------------------------------------------------------------------------------------------------------------------------------------------------------------------------------------------------------------------------------------------------------------------------------------------------------------------------------------------------------------------------------------------------------------------------------------------------------------------------------------------------------------------------------------------------------------------------------|-------------------------------------------------------------------------------------------------------------------------------------------------------------------------------------------------------------------------------------------------------------------------------------------------------------------------------------------------------------------------------------------------------------------------------------------------------------------------------------------------------------------------------------------------------------------------------------------------------------------------------------------------------------------------------------------------------------------------------------------------------------------------------------------------------------------------------------------------------------------------------------------------------------------------------------------------------------------------------------------------------------------------------------------------------------------------------------|
| Intervention | <p>The intervention/exposure being studied is: <b>A.</b> A mitigation ORO* (at any development stage including design, implemented and future upscaling); or <b>B.</b> Where no explicit intervention is present, the following study types will be included as relevant for the 'design' stage : <b>i)</b> exposure to natural analogues of a proposed mitigation ORO such as a natural sargassum bloom as an analogue for macroalgae cultivation; <b>ii)</b> observations of natural carbon flux/storage in blue carbon ecosystems; <b>iii)</b> studies relevant for estimating the potential of a proposed ORO, e.g. "Effectiveness of CO<sub>2</sub> sequestration in the pre- and post-industrial oceans"; <b>iv)</b> theoretical idea/concept/technology for an ORO is being developed; <b>v)</b> preliminary testing of the concept is being carried out ex-situ or in-situ (i.e. pilot study); <b>vi)</b> assessing potential side effects from the proposed ORO (note we exclude speculative opinions/extrapolating concluding statements).</p> | <p>No intervention is studied. This includes: hypothetical/relevance statements to a mitigation ORO in the introduction/conclusion but the ORO is not the main subject of the paper; technological advancements without explicit implementation/application to an ORO; advancements in modelling capacity/predictability that are not related to upscaling/future siting (e.g. improving forecasting models which has future applications for improving the resilience of marine renewable energy infrastructure to extreme weather); the intervention relates to solar radiation or heat management; neutral interventions (e.g. cultivation of algae for food and feed); actions mitigating pollutants that are not greenhouse gases (e.g. nitrogen oxide and sulphur oxide emissions); studies indirectly relevant to an intervention (except blue carbon) where no explicit link to the intervention is made (e.g. exclude articles discussing the natural processes driving carbon export in the open ocean - if there is no explicit mention of ocean iron fertilisation)</p> |
| Study design | <p>The study is a primary research article. This includes: book chapters (where primary research is indicated), conference proceedings, engineering papers presenting technological developments, empirical research (e.g. experimental and observational), modelling studies of upscaling potential/future siting, cost analyses, social science primary methodologies such as opinion surveys (contrary to excluding articles presenting author opinions/perspectives, opinion can be included as eligible data if recorded via a structured social science protocol like a survey).</p>                                                                                                                                                                                                                                                                                                                                                                                                                                                               | <p>The following study types are excluded: author opinions/perspectives (e.g. Ricart et al 2022 <a href="https://doi.org/10.1088/1748-9326/ac82ff">https://doi.org/10.1088/1748-9326/ac82ff</a>); reviews and meta-analyses; book introduction chapters; introductions to conference proceedings</p>                                                                                                                                                                                                                                                                                                                                                                                                                                                                                                                                                                                                                                                                                                                                                                                |

\* Definition of mitigation ORO: A human action (or control thereof, e.g. conservation interventions can be the limiting of human actions/stressors) with uses ocean-related resources to mitigate atmospheric greenhouse gases (e.g. marine renewable energies, reducing emissions in marine industries, increasing carbon sequestration, providing a location for storage of captured carbon, or addressing climate change). This includes hybrid options partly based on land, as well as actions to protect, rehabilitate or enhance blue carbon habitats. For interventions where several objectives are possible (e.g. restoring a mangrove ecosystem), mitigation objectives (can be stated in terms of desired outcomes such as increasing carbon sequestration) must be clearly stated.

Supplementary Table 2: Mitigation ORO type definitions, and the number of articles coded as relevant for each type in the LLM training data set.

| ORO type          | Definition                                                                                                                                                                                                                     | N   |
|-------------------|--------------------------------------------------------------------------------------------------------------------------------------------------------------------------------------------------------------------------------|-----|
| MRE-Ocean         | Marine renewable energy technologies that convert ocean energy (e.g. tide, wave)                                                                                                                                               | 349 |
| MRE-Located       | Marine renewable energy technologies that are located in the ocean, but are not inherently ocean-obligate – i.e. they convert energy from other sources that are not oceanic (e.g. floating solar panels, offshore wind farms) | 343 |
| MRE-Bio           | Energy is converted from marine biological sources, e.g. macroalgae cultivation                                                                                                                                                | 110 |
| Incr. Efficiency  | Options to increase energetic efficiency that result in emissions avoided.                                                                                                                                                     | 158 |
| CCS               | Options that store captured carbon (e.g. from direct air capture) in ocean reservoirs (e.g. deep waters or sediments).                                                                                                         | 256 |
| CDR-Blue Carbon   | Options that aim to increase the carbon sequestration of natural carbon sinks in blue carbon ecosystems through conservation, restoration, or afforestation.                                                                   | 195 |
| CDR-OAE           | Options that aim to increase the carbon sequestration potential of the ocean via the addition of alkaline materials.                                                                                                           | 172 |
| CDR-Biol. C. Pump | Options to enhance the biological carbon pump (e.g ocean iron fertilization, artificial upwelling)                                                                                                                             | 160 |
| CDR-Cultivation   | Options where mariculture of macro or micro-algae is used to sequester carbon dioxide by sinking the cultivated biomass.                                                                                                       | 53  |
| CDR-Other         | Other options that aim to increase ocean-related carbon sequestration that do not fall into the previous CDR categories. For example, sinking of terrestrial biomass in the ocean                                              | 22  |

Supplementary Table 3: Per-label performance metrics for the multi-label classification model for ORO type. The hyper-parameters for: batch size, weight decay, learning rate, number of epochs, and class weight (-1 indicates no weighting applied) for the best-performing model configuration are also listed.

| ORO type          | F1 - label | ROC AUC - label | precision - label | recall - label | accuracy - label | batch size | weight decay | learning rate | N epochs | class weight |
|-------------------|------------|-----------------|-------------------|----------------|------------------|------------|--------------|---------------|----------|--------------|
| MRE-Ocean         | 0.77       | 0.93            | 0.75              | 0.80           | 0.90             | 16         | 0            | 5.00E-05      | 4        | -1           |
| MRE-Located       | 0.77       | 0.93            | 0.69              | 0.89           | 0.88             | 16         | 0            | 5.00E-05      | 4        | -1           |
| CCS               | 0.72       | 0.94            | 0.71              | 0.73           | 0.95             | 16         | 0            | 5.00E-05      | 4        | -1           |
| CDR-Blue Carbon   | 0.84       | 0.97            | 0.89              | 0.80           | 0.96             | 16         | 0            | 5.00E-05      | 4        | -1           |
| MRE-Bio           | 0.78       | 0.98            | 0.76              | 0.81           | 0.98             | 16         | 0            | 5.00E-05      | 4        | -1           |
| Incr. efficiency  | 0.80       | 0.94            | 0.80              | 0.80           | 0.96             | 16         | 0            | 5.00E-05      | 4        | -1           |
| CDR-OAE           | 0.71       | 0.95            | 0.75              | 0.71           | 0.97             | 16         | 0            | 5.00E-05      | 4        | -1           |
| CDR-Biol. C. Pump | 0.70       | 0.93            | 0.75              | 0.68           | 0.97             | 32         | 0            | 5.00E-05      | 4        | -1           |

## 2 FAOLEX and ECOLEX searches

23

Supplementary Table 4: Search queries used to identify documents relevant to each ORO type from texts indexed in Whoosh [1]

| ORO type          | Whoosh query                                                                                                                                                                                                                               |
|-------------------|--------------------------------------------------------------------------------------------------------------------------------------------------------------------------------------------------------------------------------------------|
| MRE-Located       | "offshore wind" OR "offshore solar*"~2 OR "offshore photovoltaic"~3                                                                                                                                                                        |
| MRE-Ocean         | (wave OR tidal OR tide OR "ocean current"~5 OR thermohaline OR OTEC OR "salinity gradient\$" OR "ocean geotherm*") AND (energy OR power OR turbine\$)                                                                                      |
| MRE-Bio           | (seaweed OR "sea weed" OR macroalgae OR microalgae OR phytoplankton) (biofuel OR fuel) NOT (pollut* OR hydrogen*)                                                                                                                          |
| Incr. efficiency  | (marine OR ocean OR sea\$ OR offshore OR ship OR ship* OR "international maritime organi?ation") AND (((clean OR alternat*) AND (fuel\$ OR diesel) OR biofuel\$ OR efficien* OR technol*) AND (((carbon emission\$) OR "climate change"))' |
| CCS               | (marine OR ocean* OR sea\$ OR deep-sea) AND "carbon stor*"~10)                                                                                                                                                                             |
| CDR-Blue Carbon   | "blue carbon" OR ((carbon OR "climate change" OR emission*) AND (mangrov* OR wetland\$ OR "salt marsh*" OR seaweed OR "sea weed" OR macroalgae OR seagrass))                                                                               |
| CDR-OAE           | "(marine OR ocean OR sea\$) (alkalin* OR olivine OR silicate OR liming OR lime* OR weathering)"~10                                                                                                                                         |
| CDR-Biol. C. Pump | "iron (fertilization OR enhanc* OR enrich*)"~3 OR "(artificial OR enhanc* OR increas*) upwell*"~5 OR ((increas* OR enhanc*) AND ("biological pump"~3 OR "primary production"))'                                                            |

### 3 Network analysis

24

1. For each ORO, metrics of nodes in the publication to action network are assembled  
(example showing *Incr. Efficiency*)

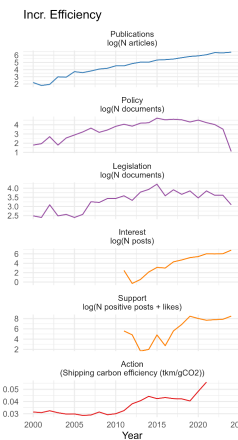

2. Each pair of metrics evaluated using variable-lag transfer entropy  
(example showing from *legislation* (node X) to *action* (node Y))

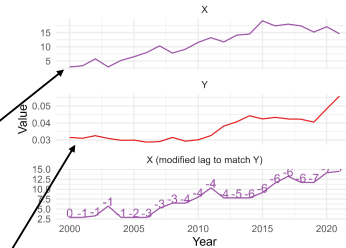

Time series of node X adjusted to match Y using dynamic time warping in order to calculate variable-lag transfer entropy (VL-TE).

VL-TE result: Significant, TE ratio = 75.4, correlation = 0.8

3. Significant edges are combined into a signed network

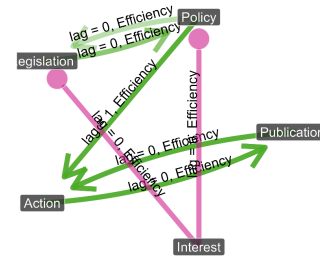

Supplementary Figure 1: Graphical description of the method using variable-lag transfer entropy [2] to construct signed networks informed by compiled metrics. This example shows the *Incr. efficiency* ORO type, but analogous analyses were conducted for all ORO types.



## 4 GLM analysis

25

Supplementary Table 5: Coefficients for the generalised linear regression of each node with respect to the proportion of publications.

| Node        | Coefficient                | Estimate  | Std. Error | t value   | P-value  | Distribution                       |
|-------------|----------------------------|-----------|------------|-----------|----------|------------------------------------|
| Policy      | (Intercept)                | 1.30E+00  | 3.70E+01   | 3.60E-02  | 9.70E-01 | Quasibinomial (dispersion = 21)    |
| Policy      | Proportion of publications | 9.40E-01  | 5.10E-01   | 1.80E+00  | 6.80E-02 | Quasibinomial (dispersion = 21)    |
| Policy      | Year                       | -1.70E-03 | 1.80E-02   | -9.20E-02 | 9.30E-01 | Quasibinomial (dispersion = 21)    |
| Legislation | (Intercept)                | -4.60E+00 | 2.70E+01   | -1.70E-01 | 8.60E-01 | Quasibinomial (dispersion = 13)    |
| Legislation | Proportion of publications | 3.00E+00  | 3.90E-01   | 7.60E+00  | 1.10E-12 | Quasibinomial (dispersion = 13)    |
| Legislation | Year                       | 1.10E-03  | 1.30E-02   | 8.20E-02  | 9.30E-01 | Quasibinomial (dispersion = 13)    |
| Interest    | (Intercept)                | -1.80E+00 | 3.20E+01   | -5.80E-02 | 9.50E-01 | Quasibinomial (dispersion = 38)    |
| Interest    | Proportion of publications | 4.30E-01  | 2.60E-01   | 1.60E+00  | 1.00E-01 | Quasibinomial (dispersion = 38)    |
| Interest    | Year                       | -7.80E-05 | 1.60E-02   | -4.90E-03 | 1.00E+00 | Quasibinomial (dispersion = 38)    |
| Support     | (Intercept)                | -2.60E+00 | 8.80E+01   | -3.00E-02 | 9.80E-01 | Quasibinomial (dispersion = 2,570) |
| Support     | Proportion of publications | 1.90E+00  | 5.30E-01   | 3.50E+00  | 5.90E-04 | Quasibinomial (dispersion = 2,570) |
| Support     | Year                       | 2.10E-04  | 4.40E-02   | 4.80E-03  | 1.00E+00 | Quasibinomial (dispersion = 2,570) |



## 5 Narrative analysis

26

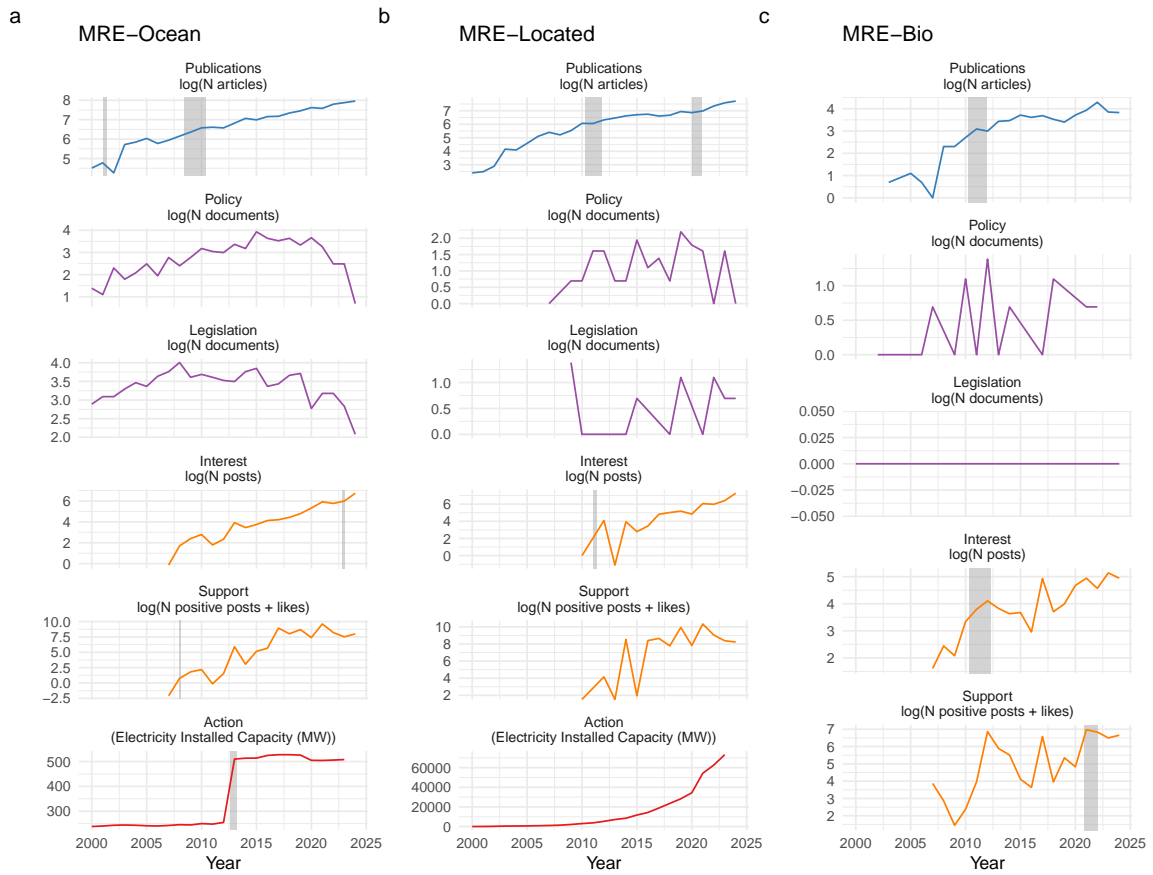

Supplementary Figure 3: Inflection points in the 'MRE' publication to action metrics. Panels **a-c** show each time series for the publication to action network for the ORO types in the 'MRE' group. Grey shaded envelopes indicate years where an inflection point was detected by a Bayesian change point analysis (25% to 75% prediction intervals).

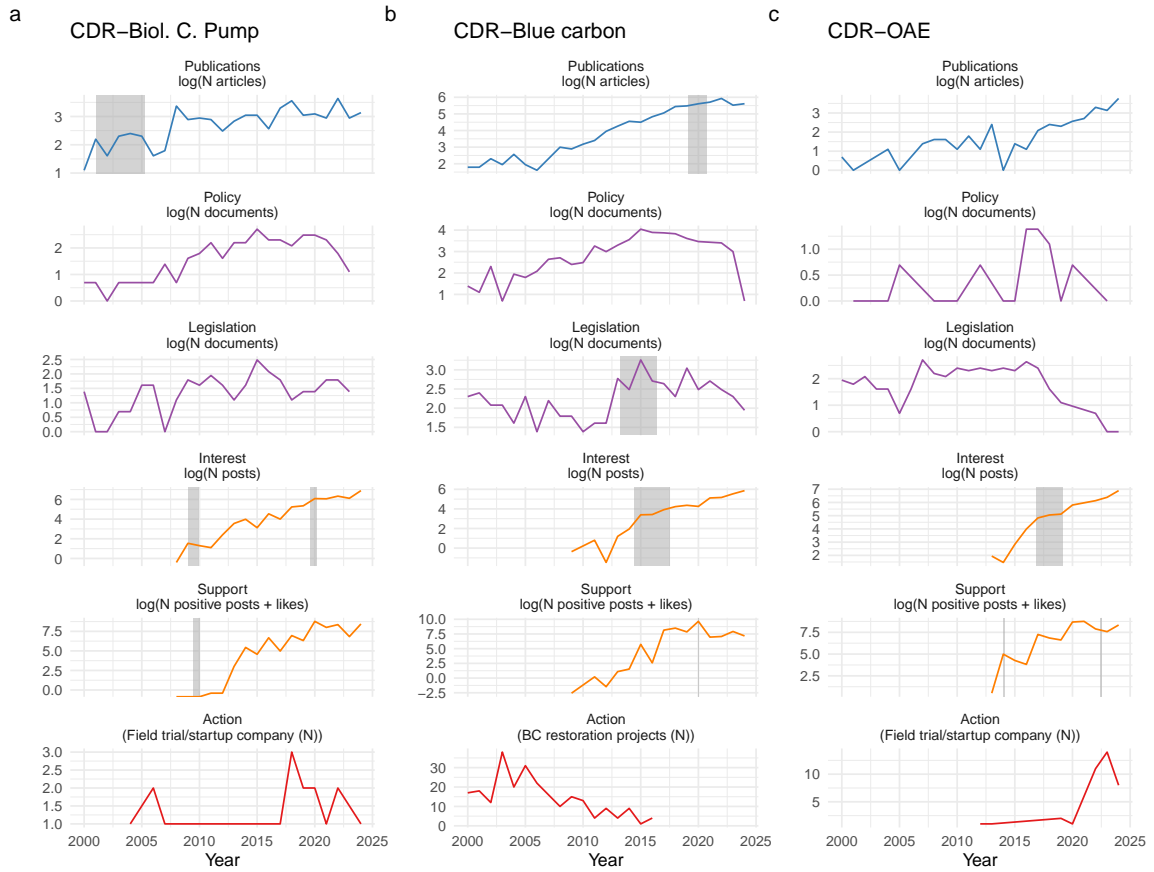

Supplementary Figure 4: Inflection points in the 'mCDR' publication to action metrics. Panels **a-c** show each time series for the publication to action network for the ORO types in the 'mCDR' group. Grey shaded envelopes indicate years where an inflection point was detected by a Bayesian change point analysis (25% to 75% prediction intervals).

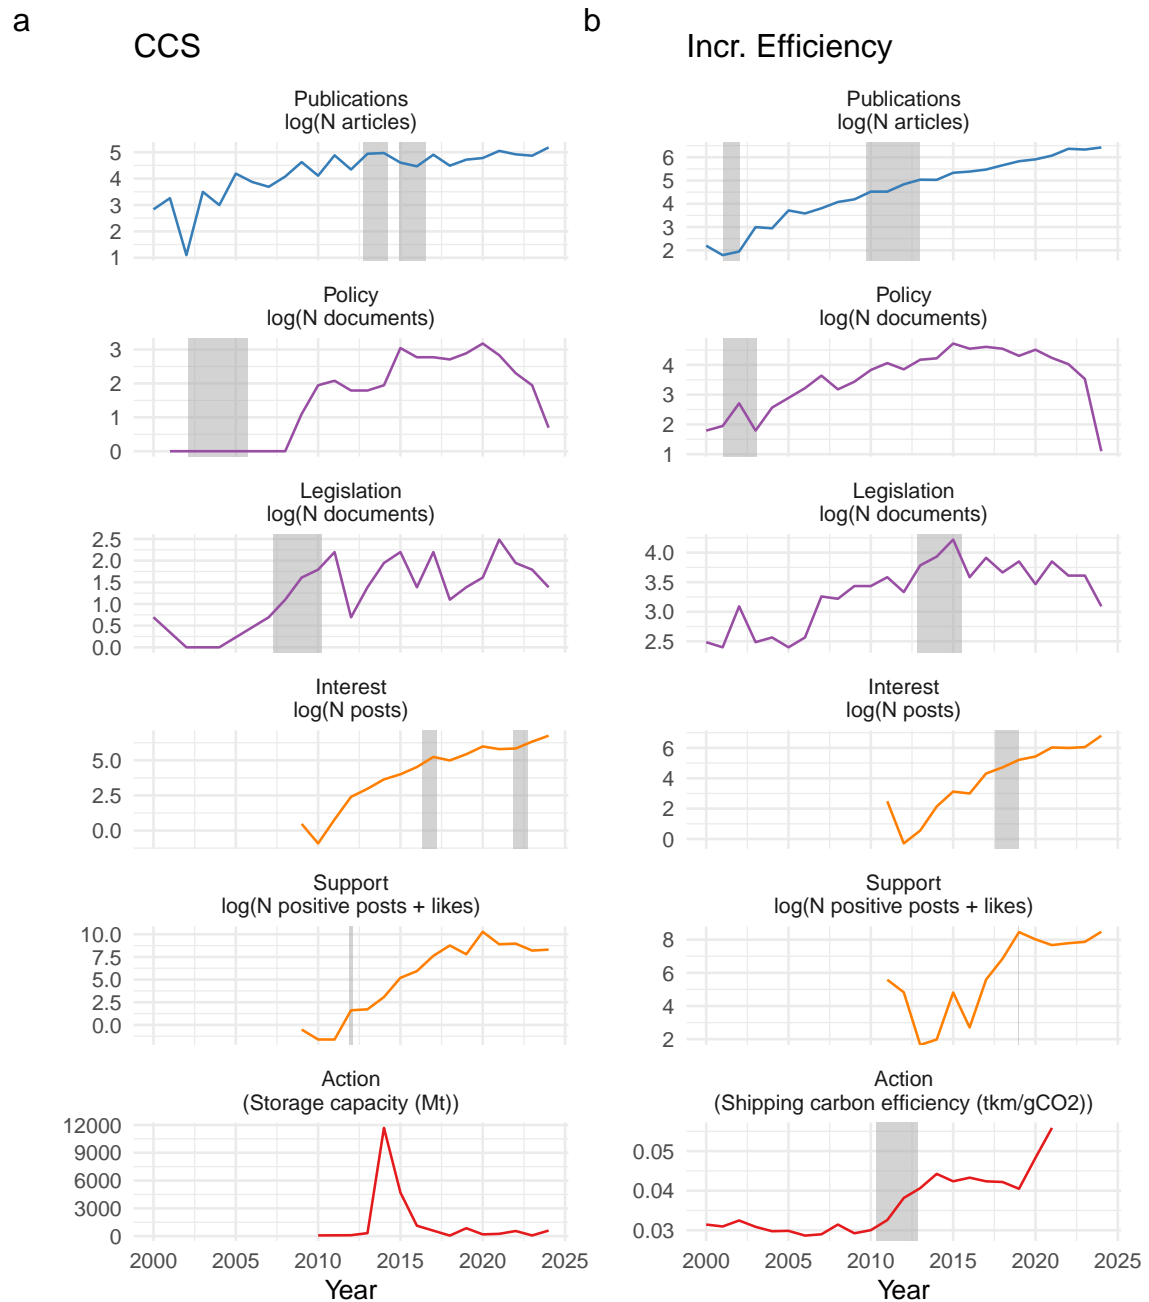

Supplementary Figure 5: Inflection points for CCS and 'Efficiency' publication to action metrics. Panels **a** & **b** show each time series for the publication to action network for the *CCS* and *Incr. Efficiency* ORO types. Grey shaded envelopes indicate years where an inflection point was detected by a Bayesian change point analysis (25% to 75% prediction intervals).

## References

27

1. Chaput, M. *Whoosh: Pure-Python full-text indexing and searching library* 2024. 28
2. Amornbunchornvej, C., Zheleva, E. & Berger-Wolf, T. Variable-lag granger causality and transfer entropy for time series analysis. *ACM Transactions on Knowledge Discovery from Data (TKDD)* **15**. Publisher: ACM New York, NY, USA, 1–30 (2021). 29  
30  
31
